# Supplementary material for: Use of Sieving as a Valuable Technology to Produce Enriched Buckwheat Flours: A Preliminary Study
Source: PubMed Central journal article supplement (PMC6943696; doi:10.3390/antiox8120583), 2019-11-25

**Figure S1.** Base peak chromatogram (BPC) of bound phenolic compounds in buckwheat flour fraction GST215, obtained by HPLC-MS. See Table 3 for identification numbers

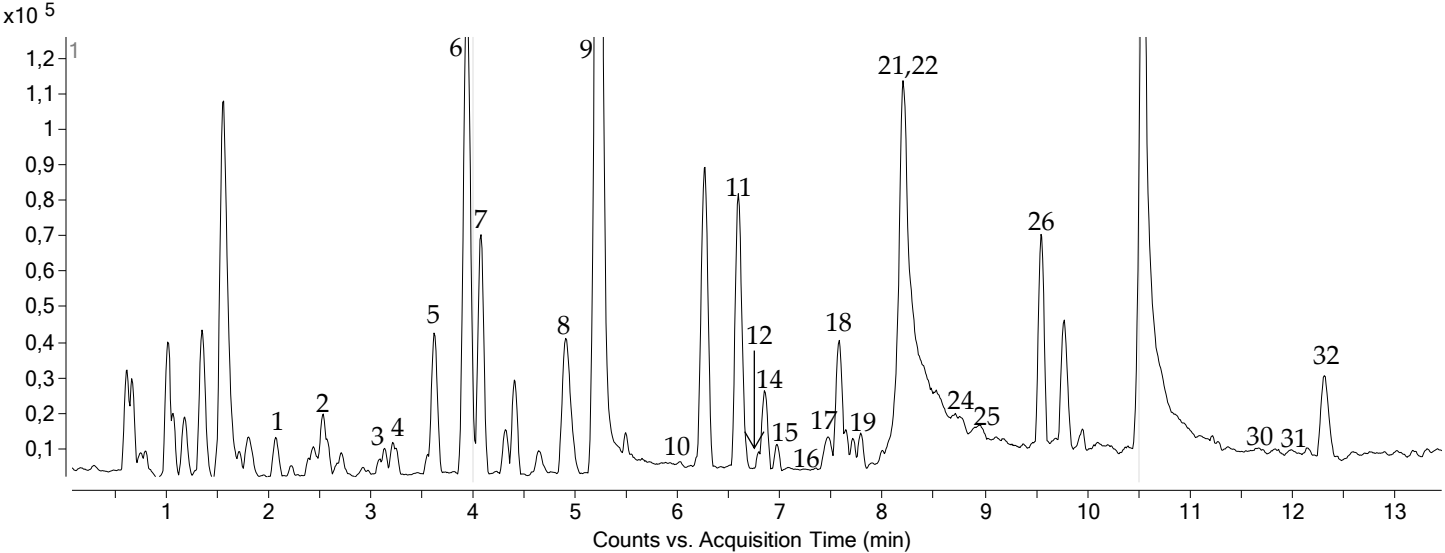

Supplement: antioxidants-08-00583-s001.pdf [file antioxidants-08-00583-s001.pdf]
